# Supplementary material for: Hydrocalumite as well as the Formation of Scheelite Induced by Its Dissolution, Removing Aqueous Tungsten with Varying Concentrations
Source: MDPI journal article supplement (doi:10.3390/ijerph19148630), 2022-07-15
Supplement: s1 [file s1]

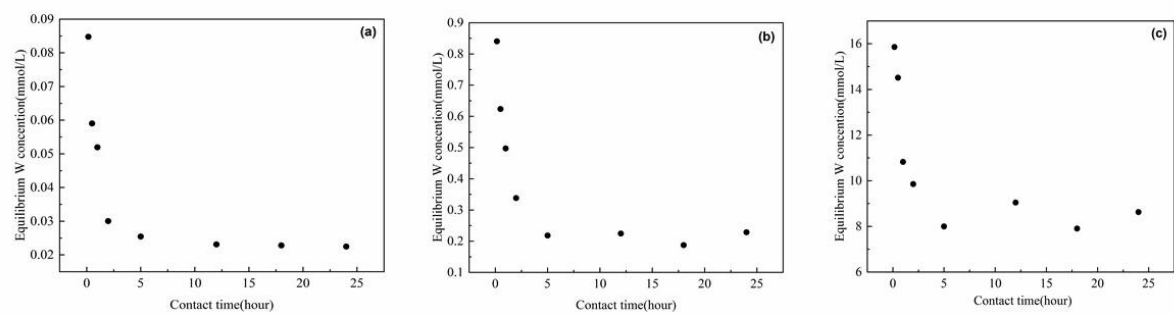

**Figure S2.** Variation of solution W concentrations with time at initial concentrations of 0.1(a), 1(b) and 20(c) mmol/L.
