# Supplementary material for: Hydrocalumite as well as the Formation of Scheelite Induced by Its Dissolution, Removing Aqueous Tungsten with Varying Concentrations
Source: MDPI journal article supplement (doi:10.3390/ijerph19148630), 2022-07-15
Supplement: s1 [file s1]

**Table S3.** Results of EDX analysis of elemental composition for solid samples recovered from tungsten removal experiments.

| Sample number | Point number | Atomic percent(%) |      |      |      |     |     |      |
|---------------|--------------|-------------------|------|------|------|-----|-----|------|
|               |              | Ca                | Al   | O    | W    | Cl  | Na  | C    |
| W0.1S         | 1            | 32.3              | 6.8  | 45.6 | 0    | 2.2 | 0   | 12.3 |
| W1S           | 2            | 27.4              | 0.86 | 49.5 | 0.1  | 0.3 | 0   | 21.6 |
| W1S           | 3            | 10.6              | 42.5 | 10.7 | 1.4  | 2.0 | 0   | 32.3 |
| W2S           | 4            | 14.4              | 2.3  | 53.9 | 0.3  | 0.6 | 0   | 27.3 |
| W2S           | 5            | 10.5              | 1.6  | 57.8 | 8.0  | 1.5 | 0   | 14.5 |
| W2S           | 6            | 10.1              | 4    | 57.9 | 6.2  | 2.2 | 0   | 15.2 |
| W5S           | 7            | 39.3              | 0    | 46.0 | 0    | 0   | 0   | 12.9 |
| W5S           | 8            | 13.4              | 0.2  | 60.0 | 0.2  | 0   | 0   | 25.6 |
| W5S           | 9            | 11.7              | 3.0  | 57.5 | 9.4  | 0.4 | 0.9 | 13.6 |
| W10S          | 10           | 13.4              | 1.9  | 56.1 | 11.4 | 0   | 1.3 | 10.9 |
| W30S          | 11           | 13.9              | 1    | 46.5 | 12.5 | 1.7 | 0   | 15.2 |

(The rationale for the sample labels appearing in the tables, figures and text is as follows: The letter W refers to tungsten. The number in the middle indicates the initial concentration of sodium tungstate in the solution. The letter S represents a solid sample. For example, the sample number W0.1S refers to the solid material after the reaction of hydrocalumite with sodium tungstate solution with an initial concentration of 0.1 mol/L .)
