# Supplementary material for: Hydrocalumite as well as the Formation of Scheelite Induced by Its Dissolution, Removing Aqueous Tungsten with Varying Concentrations
Source: MDPI journal article supplement (doi:10.3390/ijerph19148630), 2022-07-15
Supplement: s1 [file s1]

**Table S5.** Solubility product constants (KSP) for the mineral phases involved in the PHREEQC modeling.

| Mineral phase | Formula                                                                       | Dissolution reaction                                                                                                                                                            | log KSP | Source                |
|---------------|-------------------------------------------------------------------------------|---------------------------------------------------------------------------------------------------------------------------------------------------------------------------------|---------|-----------------------|
| Hydrocalumite | $\text{Ca}_4\text{Al}_2(\text{OH})_{12}\text{Cl}_2 \cdot 6\text{H}_2\text{O}$ | $\text{Ca}_4\text{Al}_2(\text{OH})_{12}\text{Cl}_2 \cdot 6\text{H}_2\text{O} = 4\text{Ca}^{2+} + 2\text{Al}(\text{OH})_4^- + 2\text{Cl}^- + 4\text{OH}^- + 6\text{H}_2\text{O}$ | -27.89  | [34]                  |
| Portlandite   | $\text{Ca}(\text{OH})_2$                                                      | $\text{Ca}(\text{OH})_2 = \text{Ca}^{2+} + 2\text{OH}^-$                                                                                                                        | -5.20   | WATEQ4F database      |
| Gibbsite      | $\text{Al}(\text{OH})_3$                                                      | $\text{Al}(\text{OH})_3 + \text{H}_2\text{O} = \text{Al}(\text{OH})_4^- + \text{H}^+$                                                                                           | -14.56  | WATEQ4F database      |
| Bayerite      | $\text{Al}(\text{OH})_3$                                                      | $\text{Al}(\text{OH})_3 + \text{H}_2\text{O} = \text{Al}(\text{OH})_4^- + \text{H}^+$                                                                                           | -13.82  | [35]                  |
| Scheelite     | $\text{CaWO}_4$                                                               | $\text{CaWO}_4 = \text{Ca}^{2+} + \text{WO}_4^{2-}$                                                                                                                             | -8.38   | SOLTHERM-XPT database |

## References

34. Bothe, J. V.; Brown, P. W. PhreeqC modeling of Friedel's salt equilibria at 23 +/- 1 degrees C. *CEMENT CONCRETE RES.* **2004**, 34, (6), 1057-1063. <https://doi.org/10.1016/j.cemconres.2003.11.016>.
35. Wagh, A. S., Chemically Bonded Phosphate Ceramics: Twenty-First Century Materials with Diverse Applications. *Elsevier Science* **2004**, 283.
