# Supplementary material for: Hydrocalumite as well as the Formation of Scheelite Induced by Its Dissolution, Removing Aqueous Tungsten with Varying Concentrations
Source: MDPI journal article supplement (doi:10.3390/ijerph19148630), 2022-07-15
Supplement: s1 [file s1]

**Table S2.** Effect of initial pH of the solution on the effect of tungsten removal by hydrocalumite (solid-liquid ratio = 2 g/L).

| number | pH <sub>initial</sub> | Initial W<br>concentration<br>(mmol/L) | Equilibrium W<br>concentration<br>(mg/L) | pH <sub>final</sub> | Adsorption<br>capacity<br>(mg/g) | W removal<br>percent<br>(%) |
|--------|-----------------------|----------------------------------------|------------------------------------------|---------------------|----------------------------------|-----------------------------|
| pH2    | 2.05                  | 2                                      | 39.57                                    | 10.74               | 164.06                           | 89.24                       |
| pH3    | 2.97                  | 2                                      | 18.92                                    | 11.07               | 174.38                           | 94.85                       |
| pH4    | 4.06                  | 2                                      | 19.70                                    | 11.12               | 173.99                           | 94.64                       |
| pH5    | 5.07                  | 2                                      | 5.80                                     | 11.26               | 180.94                           | 98.42                       |
| pH6    | 6.05                  | 2                                      | 5.26                                     | 11.41               | 181.21                           | 98.57                       |
| pH7    | 7.09                  | 2                                      | 6.86                                     | 11.47               | 180.41                           | 98.13                       |
| pH8    | 8.05                  | 2                                      | 6.45                                     | 11.42               | 180.61                           | 98.24                       |
| pH9    | 9.01                  | 2                                      | 6.39                                     | 11.42               | 180.65                           | 98.26                       |
| pH10   | 9.93                  | 2                                      | 8.53                                     | 11.35               | 179.58                           | 97.68                       |
| pH11   | 10.99                 | 2                                      | 7.28                                     | 11.41               | 170.20                           | 92.58                       |
| pH12   | 11.93                 | 2                                      | 9.79                                     | 11.67               | 178.94                           | 97.34                       |
