# Supplementary material for: Hydrocalumite as well as the Formation of Scheelite Induced by Its Dissolution, Removing Aqueous Tungsten with Varying Concentrations
Source: MDPI journal article supplement (doi:10.3390/ijerph19148630), 2022-07-15
Supplement: s1 [file s1]

**Table S1.** Experimental results of tungsten removal by hydrocalumite at 25 °C.

| Initial W concentration<br>(mmol/L) | Equilibrium W<br>concentration (mmol/L) | Adsorption<br>capacity(mg/g) | W removal<br>percent (%) | pH <sub>final</sub> |
|-------------------------------------|-----------------------------------------|------------------------------|--------------------------|---------------------|
| 0.0001                              | 0.00006                                 | 0.0035                       | 40.0                     | 11.95               |
| 0.0005                              | 0.0002                                  | 0.029                        | 60.0                     | 11.94               |
| 0.001                               | 0.0004                                  | 0.057                        | 60.0                     | 12.02               |
| 0.005                               | 0.0021                                  | 0.265                        | 58.0                     | 12.00               |
| 0.01                                | 0.0042                                  | 0.533                        | 58.0                     | 11.98               |
| 0.02                                | 0.0077                                  | 1.135                        | 61.5                     | 11.96               |
| 0.05                                | 0.0136                                  | 3.347                        | 72.8                     | 11.95               |
| 0.1                                 | 0.0225                                  | 7.127                        | 77.5                     | 11.96               |
| 0.2                                 | 0.0367                                  | 15.01                        | 81.7                     | 11.94               |
| 0.5                                 | 0.074                                   | 39.15                        | 85.2                     | 11.98               |
| 1                                   | 0.09                                    | 83.64                        | 91.0                     | 11.94               |
| 2                                   | 0.05                                    | 179.5                        | 97.5                     | 12.00               |
| 5                                   | 0.04                                    | 456.1                        | 99.2                     | 12.08               |
| 10                                  | 0.34                                    | 888.0                        | 96.6                     | 12.20               |
| 15                                  | 2.93                                    | 1109.9                       | 80.5                     | 12.31               |
| 20                                  | 7.81                                    | 1120.5                       | 61.0                     | 12.32               |
| 25                                  | 13.03                                   | 1100.6                       | 47.9                     | 12.35               |
| 30                                  | 18.05                                   | 1098.0                       | 39.8                     | 12.40               |
| 40                                  | 28.04                                   | 1099.1                       | 29.9                     | 12.43               |
