# Supplementary material for: Hydrocalumite as well as the Formation of Scheelite Induced by Its Dissolution, Removing Aqueous Tungsten with Varying Concentrations
Source: MDPI journal article supplement (doi:10.3390/ijerph19148630), 2022-07-15
Supplement: s1 [file s1]

**Table S4.** Fitting parameters for Ca 2p<sub>3/2</sub>.

| sample | HC       |          |      |      | CaWO <sub>4</sub> |          |      |      |
|--------|----------|----------|------|------|-------------------|----------|------|------|
|        | BE       |          | FWHM | %    | BE                |          | FWHM | %    |
|        | Ca2p 1/2 | Ca2p 3/2 |      |      | Ca2p 1/2          | Ca2p 3/2 |      |      |
| HC     | 350.5    | 346.97   | 1.51 | 100  |                   |          |      |      |
| W1S    | 350.67   | 347.15   | 1.41 | 66.7 | 350.17            | 346.64   | 1.54 | 33.3 |
| W2S    | 350.73   | 347.21   | 1.41 | 60.2 | 350.2             | 346.64   | 1.5  | 39.8 |
| W30S   |          |          |      |      | 350.18            | 346.61   | 1.59 | 100  |

(HC: pristine hydrocalumite)
