# Supplementary figures and images for: Hydrocalumite as well as the Formation of Scheelite Induced by Its Dissolution, Removing Aqueous Tungsten with Varying Concentrations
Source: MDPI journal article supplement (doi:10.3390/ijerph19148630), 2022-07-15

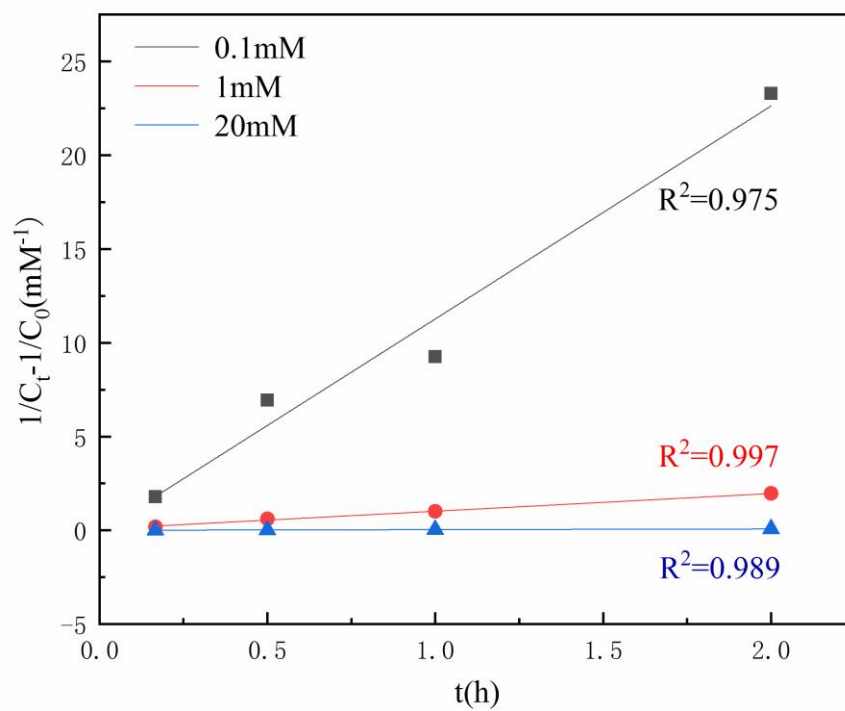

**Figure S3.** Reaction kinetics model fitting diagram.

Supplement: s1 [file s1]

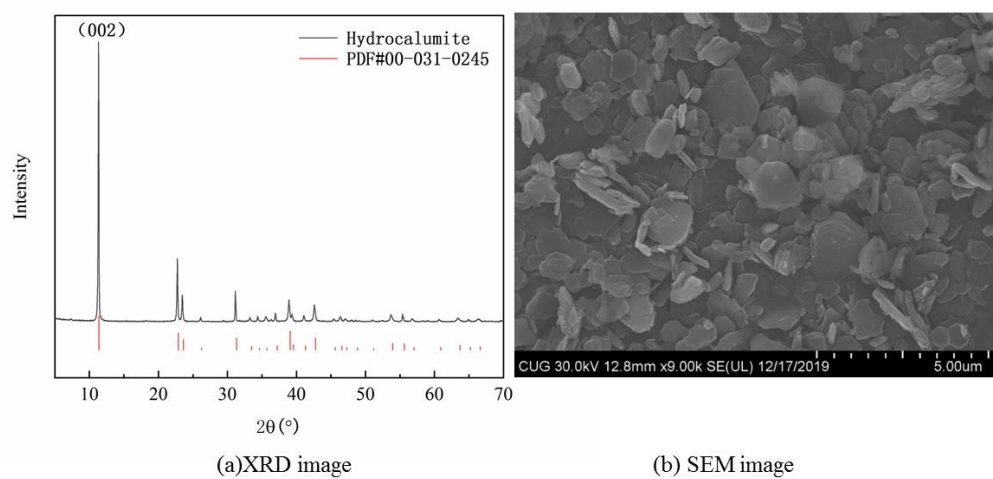

**Figure S1.** Characterization of hydrocalumite synthesized by coprecipitation method.

Supplement: s1 [file s1]

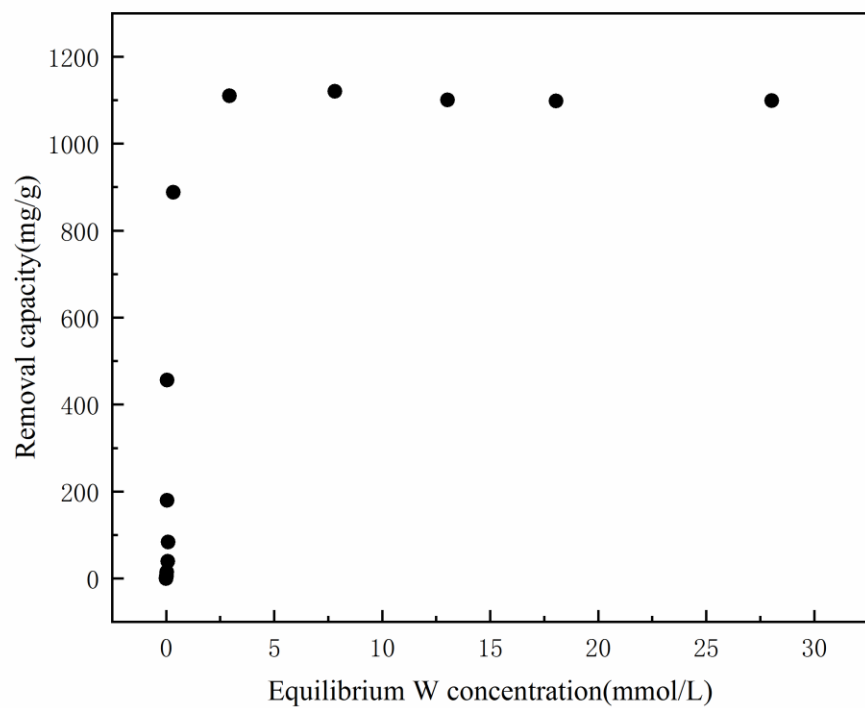

**Figure S4.** Experimental results of tungsten removal by hydrocalumite at 25°C.

Supplement: s1 [file s1]
